# Supplementary material for: Clinical and immunological control of experimental autoimmune encephalomyelitis by tolerogenic dendritic cells loaded with MOG-encoding mRNA
Source: Springer Nature journal article supplement (doi:10.1186/s12974-019-1541-1), 2019-08-15
Supplement: MOESM1 [file 17072194]

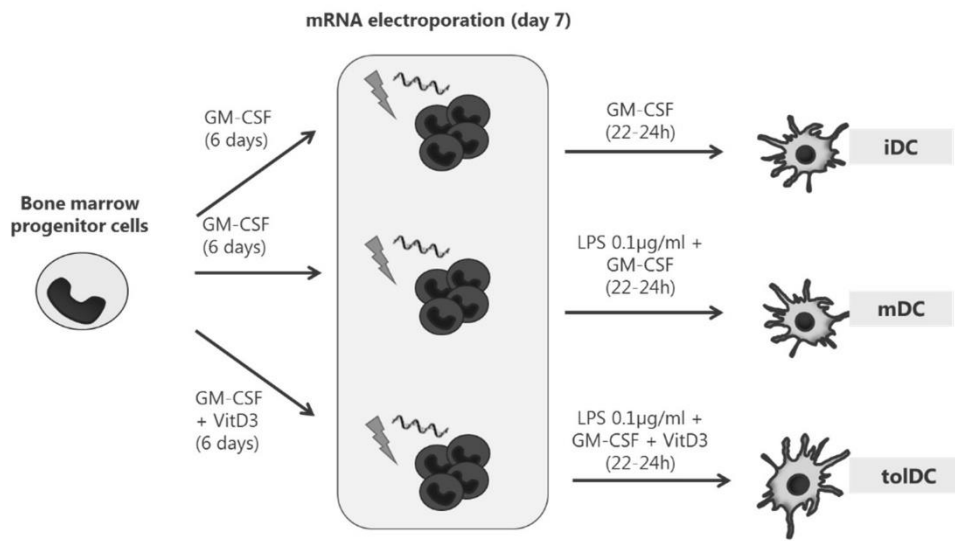

Supplementary Figure 1. Graphical overview of the culture protocol for murine bone marrow-derived dendritic cells.
