# Supplementary material for: Clinical and immunological control of experimental autoimmune encephalomyelitis by tolerogenic dendritic cells loaded with MOG-encoding mRNA
Source: Springer Nature journal article supplement (doi:10.1186/s12974-019-1541-1), 2019-08-15
Supplement: MOESM3 [file 17072194]

SUPPLEMENTARY FIGURE 3

**A.** *Sig*-full length MOG-LAMP-3 vector

ACTAGTGCCACCATGGCTGCCCCCTGGCGCCAGAAGGCCTCTGCTGCTGCTCCTGCTGGCTGGCCTGGCTCATG  
GCGCCAGCGCCCTGTTGAGGACCCTGCCTGCCTGTGGTCCTTCAGCTGGCCCAGCTGCTTCTGAGCCTC  
CTGCTCCTGCTCCTCCTGCAGCTGAGCTGCTCCTACGCCGGCCAGTTCAGAGTGATCGGCCCTGGCTACC  
CCATCAGAGCCCTCGTGGGAGATGAGGCCGAGCTGCCCTGCAGAATCAGCCCCGCAAGAACGCCACC  
GGCATGGAAGTGGGCTGGTACAGATCCCCCTCAGCCGGGTGGTGCACCTGTACAGAAACGGCAAGG  
ACCAGGACGCCGAGCAGGCCCCCGAGTACAGAGGCAGAACCAGCTGCTGAAAGAGACAATCAGCGA  
GGCAAAGTGACCCTGAGAATCCAGAACGTGCGGTTACGCGACGAGGGCGGCTACACCTGTTTCTTCC  
GGGACCACAGCTACCAAGAAGAGGCCGCCATGGAAGTGAAGTTCGAGGACCCCTTCTACTGGGTCAAC  
CCCGCGTGCTGACCCTGATCGCCCTGGTGCCACAATCCTGCTCCAGGTGTCCGTGGGCCTGGTGTC  
CTGTTCTGCAGCACAGACTGAGAGGCAAGCTGAGAGCCGAGGTGAAAACCTGCACAGAACCTTCG  
ACCCCCACTTCTGAGAGTGCCCTGCTGGAAGATCACCTGTTTCGTGATCGTGCCCGTCTGGGCCCT  
GGTGGCCCTGATCATCTGCTACAACCTGGCTGCACAGAAGGCTGGCCGGACAGTTCCTGGAAGAACTGA  
GAAACCCCTTCTGTCCGACTACACCGTGGTGCTGCCCATGGTGGCCATCATCGTGGTGGTTCATCTGCGTCG  
TGGGCCTGAGCGTGTACAAGATCAGACAGAGACACCAGAGCAGCGCCTACCAGAGAATCTGA

**B.** *Sig*-extracellular MOG-LAMP-3 vector

ACTAGTGCCACCATGGCTGCTCCAGGTGCTAGAAGGCCTCTGCTGCTTCTGCTTCTGGCTGGACTTGCTCATG  
GCGCCTCTGCTCTGTTGAGGACCCTGGCCAGTTTGTAGAGTGATCGGCCCTGGATACCCTATCAGAGCCCTC  
GTGGGAGATGAGGCCGAGCTGCCTTGTAGAATCTCTCCTGGCAAGAACGCCACCGGCATGGAAGTCGG  
ATGGTACAGATCCCATTACAGCAGAGTGGTGCACCTGTACAGAAACGGCAAGGACCAGGATGCTGAGC  
AGGCTCCTGAGTACAGAGGCAGAACCGAGCTGCTGAAAGAGACAATCAGCGAGGGCAAAGTGACCCT  
GAGAATCCAGAACGTGCGGTTACGCGACGAAGGCGGCTACACATGTTTCTCAGGGACCACAGCTACC  
AAGAGGAAGCCGCCATGGAAGTGAAGTTCGAGGACCCCTTTTACTGGGTCAACCCTGGCGTGCTGACA  
CTGAGCGATTACACCGTGGTGCTGCCTATGGTGGCCATCATCGTGGTGGTTCATCTGTGTCGTGGGCCTGAGC  
GTGTACAAGATCAGACAGAGACACCAGAGCAGCGCCTACCAGAGAATCTGA

Supplementary Figure 3. Nucleotide sequence of the *Sig*-full length MOG-LAMP-3 (**A**) and *Sig*-extracellular MOG-LAMP-3 (**B**) constructs, both codon-optimized for mus musculus. MOG nucleotide sequence was based on NCBI gene 17441. Legend: *Sig* sequence; **MOG sequence**; LAMP-3 sequence.
