# Supplementary material for: Clinical and immunological control of experimental autoimmune encephalomyelitis by tolerogenic dendritic cells loaded with MOG-encoding mRNA
Source: Springer Nature journal article supplement (doi:10.1186/s12974-019-1541-1), 2019-08-15
Supplement: MOESM4 [file 17072194]

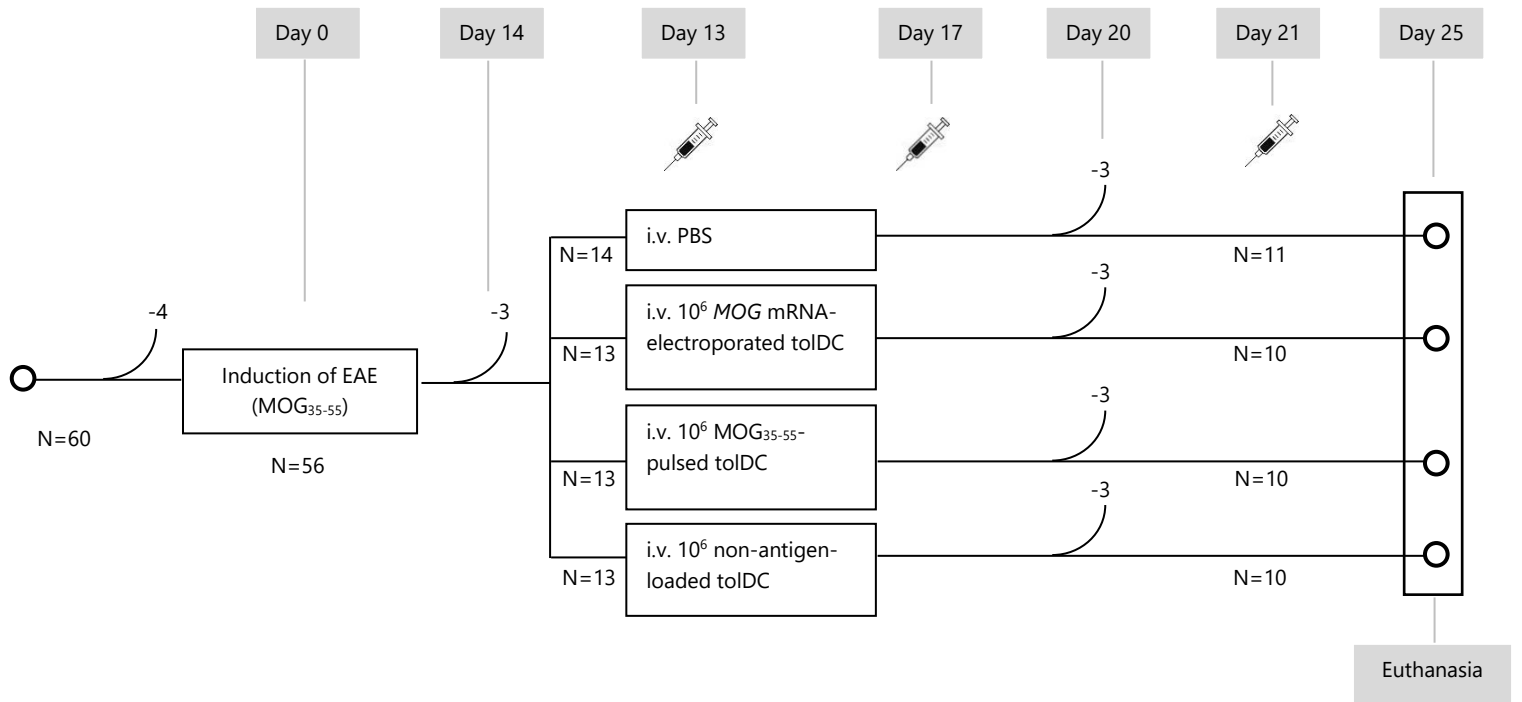

Supplementary Figure 4. Graphical overview of the experimental set-up of the *in vivo* experiment. Therapeutic administrations were performed at day 13 pi, day 17 pi and day 21 pi, represented by a syringe on this figure. Abbreviations used: pi, post induction; i.v., intravenously.
