# Supplementary material for: Clinical and immunological control of experimental autoimmune encephalomyelitis by tolerogenic dendritic cells loaded with MOG-encoding mRNA
Source: Springer Nature journal article supplement (doi:10.1186/s12974-019-1541-1), 2019-08-15
Supplement: MOESM5 [file 17072194]

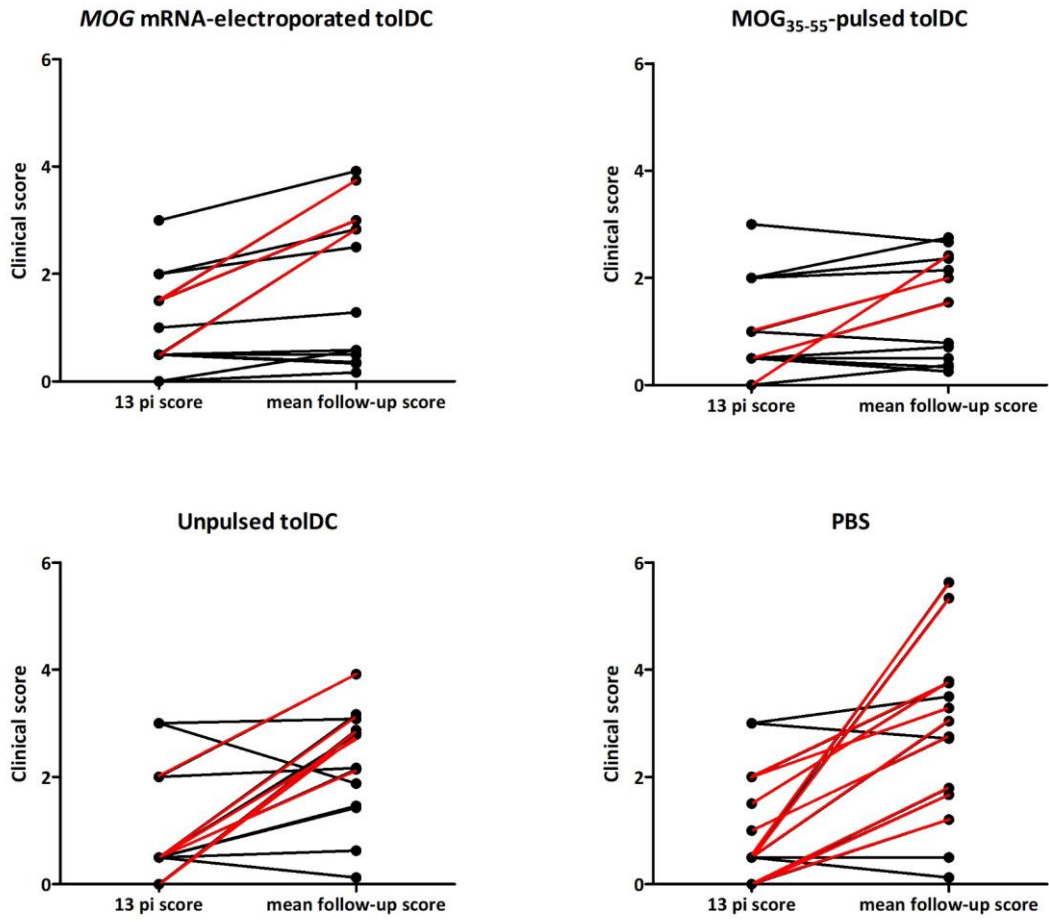

Supplementary Figure 5. Representation of individual clinical score of the initial day of treatment (day 13 pi) and the corresponding mean clinical score during the treatment period (from day 14 pi to sacrifice) from mice treated with non-antigen-loaded toIDC (n=13), MOG<sub>35-55</sub>-pulsed toIDC (n=13), MOG mRNA-electroporated toIDC (n=13) or PBS (n=14). Non-responder mice are highlighted in red.
