# Supplementary material for: Clinical and immunological control of experimental autoimmune encephalomyelitis by tolerogenic dendritic cells loaded with MOG-encoding mRNA
Source: Springer Nature journal article supplement (doi:10.1186/s12974-019-1541-1), 2019-08-15
Supplement: MOESM6 [file 17072194]

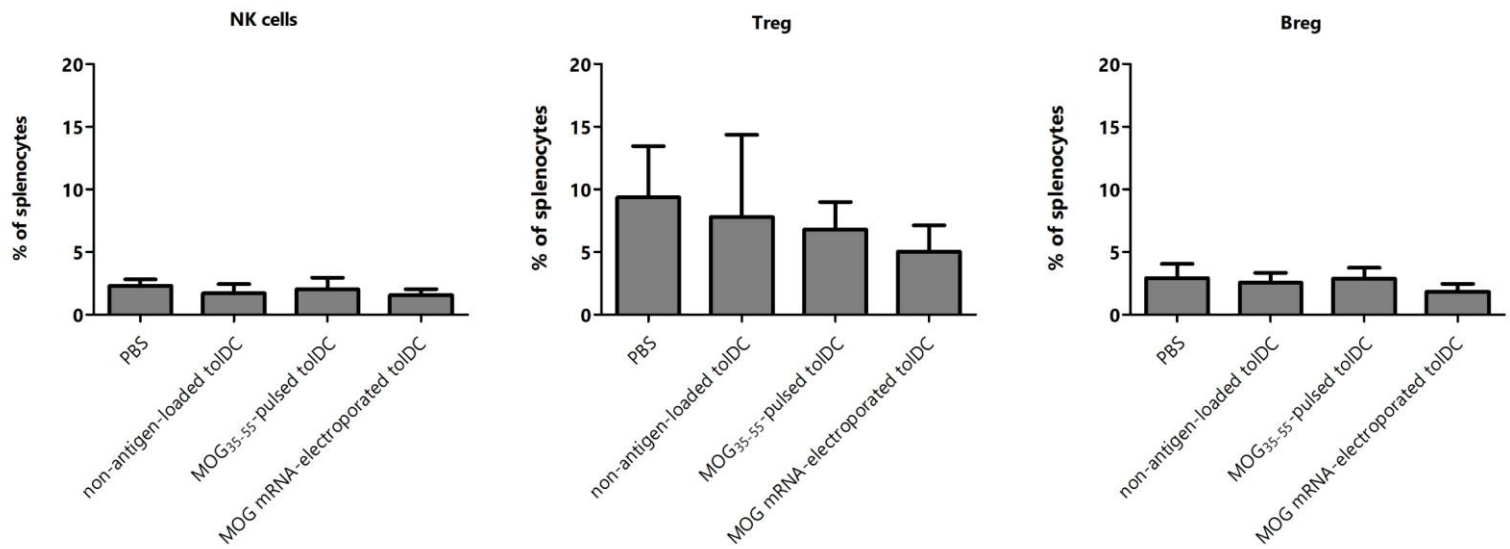

**Supplementary Figure 6.** Flow cytometric evaluation of the proportion of Treg (CD3+CD4+CD25+), Breg (CD19+CD5+CD1d+) and NK cells (CD3-NKp46+NK1.1+) in splenocytes of mice treated with vehicle only (PBS), non-antigen-loaded toIDC, MOG<sub>35-55</sub>-pulsed toIDC or MOG mRNA-electroporated toIDC. Mice (n=9 in the PBS-treated group and n=10 in the three other treatment groups) were sacrificed at the end of the in vivo model (day 25 pi). No statistically significant difference in the proportion of regulatory immune cell subsets could be demonstrated between the different treatment groups using Kruskal-Wallis test with Dunn's post-hoc test.
