# Supplementary material for: Clinical and immunological control of experimental autoimmune encephalomyelitis by tolerogenic dendritic cells loaded with MOG-encoding mRNA
Source: Springer Nature journal article supplement (doi:10.1186/s12974-019-1541-1), 2019-08-15
Supplement: MOESM7 [file 17072194]

SUPPLEMENTARY TABLE 1

| <b>Peptide</b>                | <b>Amino acid sequence</b> |
|-------------------------------|----------------------------|
| <b>MBP</b> <sub>4-14</sub>    | QKRPSQRSKYL                |
| <b>MBP</b> <sub>84-97</sub>   | VVHFFKNIVTPRTP             |
| <b>PLP</b> <sub>139-151</sub> | HCLGKWLGHDPKF              |
| <b>PLP</b> <sub>178-191</sub> | NTWTTCQSIAPPSK             |
| <b>PLP</b> <sub>56-70</sub>   | DYEYLVNVIHAFQYV            |
| <b>MOG</b> <sub>35-55</sub>   | MEVGWYRSPFSRVVHLYRNGK      |
| <b>MOG</b> <sub>92-106</sub>  | DEGGYTCFFRDHSYQ            |

Supplementary Table 1. Amino acid sequences of the myelin peptides used for screening for inter- and intramolecular epitope spreading.
