# Supplementary material for: Clinical and immunological control of experimental autoimmune encephalomyelitis by tolerogenic dendritic cells loaded with MOG-encoding mRNA
Source: Springer Nature journal article supplement (doi:10.1186/s12974-019-1541-1), 2019-08-15
Supplement: MOESM8 [file 17072194]

SUPPLEMENTARY TABLE 2

|                             | <b>PBS</b>   | <b>Non-antigen-loaded toIDC</b> | <b>MOG mRNA-electroporated toIDC</b> | <b>MOG<sub>35-55</sub>-pulsed toIDC</b> |
|-----------------------------|--------------|---------------------------------|--------------------------------------|-----------------------------------------|
| <b>Maximum score</b>        | 3.46 ± 1.59  | 2.81 ± 1.15                     | 2.15 ± 1.53                          | 2.00 ± 1.24                             |
| <b>Cumulative score</b>     | 32.00 ± 19.6 | 25.31 ± 14.2                    | 20.38 ± 17.5                         | 16.77 ± 11.9                            |
| <b>N° of responders (%)</b> | 4/14 (28.6%) | 7/13 (53.8%)                    | 10/13 (76.9%)                        | 10/13 (76.9%)                           |

Supplementary Table 2. Clinical data of MOG<sub>35-55</sub> EAE mice treated with PBS, non-antigen-loaded toIDC, MOG mRNA-electroporated toIDC or MOG<sub>35-55</sub>-pulsed toIDC. Maximum score: group mean of the maximum score for each mouse. Cumulative score: group mean of the sum of daily scores for each mouse from day 7 pi onwards. Data are expressed as mean ± standard deviation. Responders: mice showing a <1-point increase in the mean clinical score compared to their respective initial clinical score at first treatment administration (day +13 pi). The mean clinical score during the treatment for each mouse was calculated as the sum of daily scores from day 14 pi to 25 pi divided by 12 (number of follow-up days after treatment). Abbreviations used: pi, post induction.
